# Supplementary material for: Prehospital ultrasound-guided nerve blocks improve reduction-feasibility of dislocated extremity injuries compared to systemic analgesia. A randomized controlled trial
Source: PubMed Central journal article supplement (PMC6028078; doi:10.1371/journal.pone.0199776), 2018-07-02
Supplement: pone.0199776.s001.pdf [file pone.0199776.s001.pdf]

Date:

## Study protocoll: Prehospital peripheral nerve blocks (PNB)

---

**Patient data:**

**Phone:**

|           |                                                                                      |                                                                                                               |
|-----------|--------------------------------------------------------------------------------------|---------------------------------------------------------------------------------------------------------------|
| Initials: | Sex:                                                                                 | Age:                                                                                                          |
| ASA:      | Weight:                                                                              | Height:                                                                                                       |
| Trauma:   | Open / closed fracture:<br><br>Dislocated injury and reduction required<br>(yes/no): | Pain according to NRS (1-10) before analgesic approach:<br><br>Reposition (easy / intermediate / impossible): |

### **Group 1: regional anesthesia, PNB**

|                            |  |                                                        |  |
|----------------------------|--|--------------------------------------------------------|--|
| Puncture site:             |  | Local anesthetic:                                      |  |
| Time till onset of action: |  | Effect A/B/C:                                          |  |
| Sensitivity                |  | Dose of s-ketamine / fentanyl (by previous acting EP): |  |
| Motor function             |  | Dose of midazolam (by previous acting EP):             |  |

### **Group 2: analgosedation:**

**Drug doses were documented in the medical record of the trial emergency physician**

**Both groups:**

**Process times according to the medical record of the trial emergency physician**

**Vital parameter:**

|                    | initial | post analgesic approach | minimal | maximal |
|--------------------|---------|-------------------------|---------|---------|
| Heart rate:        |         |                         |         |         |
| Blood pressure:    |         |                         |         |         |
| SpO <sub>2</sub> : |         |                         |         |         |

## Interview, on second day post-intervention

### 1. Pain during during the prehospital medical intervention

1.1 Did you feel pain during the prehospital medical intervention?

Yes  No

1.1.1 If so, please indicate pain severity? (Select pain severity, whereat value ,0' corresponds to no pain and value ,10' corresponds to means worst pain imaginable)

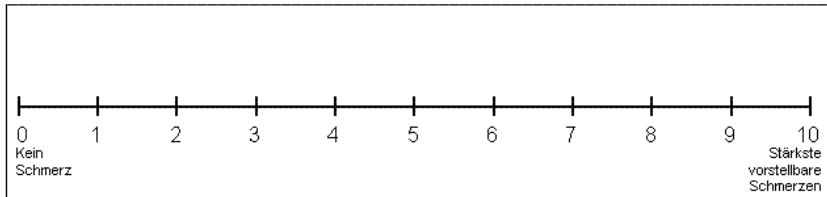

### 2. Pain post-intervention

2.1 Have you taken analgesics after the prehospital medical intervention?

Yes  No

2.1.1 If so, which analgesics have you taken at which day post-intervention?

- Ibuprofen Day of accident  1. day post-intervention  2. day post-intervention

Which daily intake? Day of accident \_\_\_ 1. day post-intervention \_\_\_ 2. day post-intervention \_\_\_

- Oxycodone/naloxone Day of accident  1. day post-intervention  2. day post-intervention

Which daily intake? Day of accident \_\_\_ 1. day post-intervention \_\_\_ 2. day post-intervention \_\_\_

- Other Day of accident  1. day post-intervention  2. day post-intervention

Which daily intake? Day of accident \_\_\_ 1. day post-intervention \_\_\_ 2. day post-intervention \_\_\_

**These questions relate pain after prehospital medical intervention:**

3.1 Did you have pain **immediatly after the prehospital medical intervention?**

Yes  No

3.1.1 If so, please indicate pain severity? (Select pain severity, whereat value ,0' corresponds to no pain and value ,10' corresponds to means worst pain imaginable)

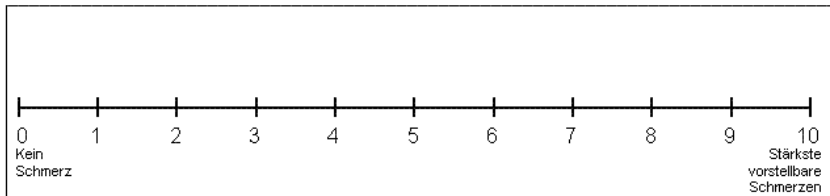

3.2 Did you have pain **on first day post-intervention?**

Yes  No

3.2.1 If so, please indicate pain severity? (Select pain severity, whereat value ,0' corresponds to no pain and value ,10' corresponds to means worst pain imaginable)

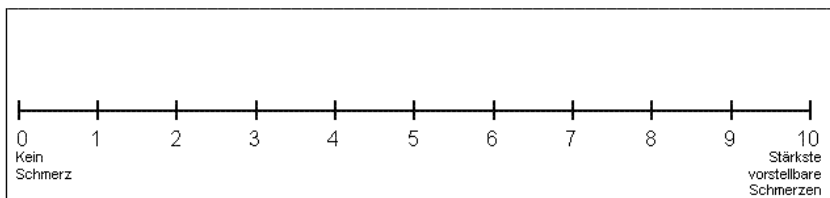

3.3 Did you have pain **on second day post-intervention?**

Yes  No

3.3.1 If so, please indicate pain severity? (Select pain severity, whereat value ,0' corresponds to no pain and value ,10' corresponds to means worst pain imaginable)

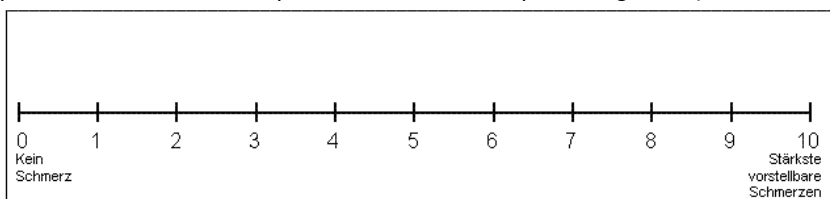

3.4 Did you have pain **during the prehospital medical intervention?**

Yes  No

3.4.1 If so, please indicate pain severity? (Select pain severity, whereat value ,0' corresponds to no pain and value ,10' corresponds to means worst pain imaginable)

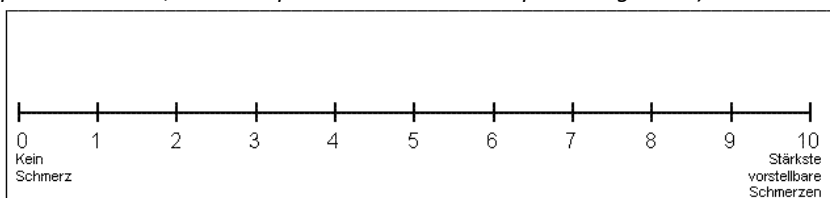

**These questions relate complications after the prehospital medical intervention:**

3.5 Did you experience any discomfort like tingling, deafness or paralysis of the injured limb from the first day after prehospital medical intervention?

Yes  No

3.5.1 If so, how long did this discomfort last?

\_\_\_\_\_

3.5.2 If so, which specific discomfort did you experience?

\_\_\_\_\_

**4. Satisfaction with the specific analgesic procedure**

4.1 Were you satisfied with your specific analgesic procedure during the prehospital medical intervention?

(Likert scale of 1=very satisfied to 6=very unsatisfied)

Likert scale (1 - 6): \_\_

4.2 Would you recommend your specific analgesic procedure?

Yes  No

Thank you very much for your support!

Your responsible emergency physician
