# Supplementary material for: Prehospital ultrasound-guided nerve blocks improve reduction-feasibility of dislocated extremity injuries compared to systemic analgesia. A randomized controlled trial
Source: PLoS One. 2018 Jul 2;13(7):e0199776. doi: 10.1371/journal.pone.0199776 (PMC6028078; doi:10.1371/journal.pone.0199776)
Supplement: S1 Table — (XLSX) [file pone.0199776.s004.xlsx]

## Sheet: Tabelle1
Pat.NR.	PNB/Kontr	Geschlecht	Alter	Größe [cm]	Körper-gewicht [kg]	Asa (1-3)	Trauma Offen/geschlossen	Disloziert (ja/nein)	Reposition (gut/mäßig/nicht möglich)	NRS Vor Analgesie (1-10)	Lokalisation Traum	Lokalisation Trauma genau	Anlagezeit (Min)	Parästhesien (ja/Nein)	Menge LA (ml)	PNB Effekt	Sensorische Blockade	Motorische Blockade (KG)	NRS Nach Analgesie (1-10)	Ketanest Ja	Fentanyl Ja	Midazolam Ja	Alarm NA	Ankunft NA	Beginn Analgesie	Wirkung Analgesie	Minuten zur Analgesie	Abfahrt EST	Ankunft KH	Beginn Diagnostik	Ausgang: HF	Ausgang: RR Sys	Ausgang: RR Dias	Ausgang: SPO2	Nach Analgesie: HF	Nach Analgesie: RR sys	Nach Analgesie: RR Dias	Nach Analgesie: SPO2	KG 5 (Stunden)	Größter Schmerz Diagnostik (1-10)	Schmerzen während Intervention NA?	NRS Intervention (1-10) mit NRS 0	NRS Intervention (1-10) ohne NRS 0	Postop Analgetika?	NSAR Tage (1-3)	Opiate Tage 1-3	Schmerzen am Interventions Tag?	NRS Interventionstag Tag (1-10) mit NRS 0	NRS Interventionstag Tag (1-10) ohne NRS 0
1	PNB	m	69	178	92	1	geschlossen	ja	gut	5	Arm	Arm	3	Nein	20	A	Ja	2	3	Nein	Ja	Ja									97								10	5	Nein	0		Ja	3	3	Ja	3	3
2	Kontrolle	w	47	168	62	2	geschlossen	ja	nicht möglich	10	Arm	Ellenbogen	2						1	Ja	Nein	Ja	08:04:00	08:13:00	08:15:00	08:16:00	1	08:44:00	08:56:00	09:30:00	85	132	95	97	55	125	90	100		5	Nein	0		ja	3	3	nein	0
3	Kontrolle	m	38	175	80	1	geschlossen	ja	nicht möglich	10	Arm	Ellenbogen	2						8	Nein	Ja	Nein	13:57:00	14:07:00	14:10:00	14:12:00	2	14:18:00	14:33:00	15:00:00	80	130	90	97	90	140	90	98		10	ja	8	8	Ja	3	3	Ja	8	8
4	Kontrolle	w	81	168	80	2	geschlossen	Ja	mäßig	10	OS	Femur	2						8	Nein	Ja	Nein	17:36:00	17:48:00	17:50:00	17:52:00	2	18:18:00	18:29:00	18:45:00	110	160	90	96	100	150	85	97		10	ja	10	10	Ja	2	2	Ja	8	8
5	PNB	m	74	176	84	1	geschlossen	ja	nicht möglich	8	US	OSG	2	Nein	30	A	Ja	1	0	Ja	Nein	Ja	10:41:00	10:50:00	11:00:00	11:02:00	2	11:20:00	11:35:00	12:00:00	80	160	90	93	74	160	80	99	25	0	Nein	0		Ja	0	2	nein	0
6	PNB	m	74	176	84	1	geschlossen	ja	nicht möglich	8	US	OSG	2	Nein	30	A	Ja	1	0	Ja	Nein	Ja	10:41:00	10:50:00	11:00:00	11:02:00	2	11:20:00	11:35:00	12:00:00	80	160	90	93	74	160	80	99	25	0	Nein	0		Ja	0	2	nein	0
7	Kontrolle	m	41	180	100	1	offen	nein		8	Arm	Finger	3						8	Nein	Ja	Nein	13:04:00	13:17:00	13:20:00	13:23:00	3	13:37:00	14:00:00	14:02:00	100	183	100	95	180	90	180	90		8	ja	8	8	Ja	3	0	Ja	8	8
8	Kontrolle	m	25	185	90	1	geschlossen	nein		9	Arm	Ellenbogen	2						7	Ja	Nein	Ja	18:47:00	18:53:00	18:55:00	18:57:00	2	19:10:00	19:10:00	19:25:00	110	150	90	100	100	150	80	99		7	ja	7	7	Ja	3	3	Ja	7	7
9	PNB	m	22	180	82	1	geschlossen	ja	gut	9	US	Tibia	2	Nein	20	A	Ja	2	0	Ja	Nein	Ja	12:02:00	12:08:00	12:12:00	12:14:00	2	12:25:00	12:30:00	12:40:00	100	160	80	99	100	170	80	99	20	0	Nein	0		Ja	0	3	Ja	4	4
10	PNB	m	33	192	120	1	offen	ja	nicht möglich	9	Arm	Hand	2	Nein	20	A	Ja	1	0	Ja	Nein	Nein	17:57:00	18:17:00	18:23:00	18:25:00	3	18:40:00	19:00:00	19:10:00	100	140	90	100	75	125	80	98	18	0	Nein	0		Ja	3	0	nein	0
11	Kontrolle	m	26	184	94	1	geschlossen	ja	nicht möglich	9	OS	Knie+Femur	1						0	Nein	Ja	Nein	11:55:00	12:02:00	12:06:00	12:07:00	1	12:20:00	12:28:00	12:40:00	100	180	90	99	80	160	75	99		0	ja	5	5	Ja	3	3	nein	0
12	PNB	m	45	182	82	3	offen	ja	gut	7	US	OSG	2	Nein	20	A	Ja	1	2	Nein	Nein	Nein	19:01:00	19:10:00	19:15:00	19:17:00	2	19:47:00	19:55:00	20:05:00	68	120	80	96	68	120	80	98	15	8	ja	3	3	Ja	3	3	Ja	3	3
13	Kontrolle	w	53	168	58	1	geschlossen	ja	gut	10	US	OSG	2						0	Ja	Nein	Ja	18:14:00	18:19:00	18:28:00	18:30:00	2	18:40:00	18:52:00	19:10:00	100	200	110	99	80	130	80	91		0	Nein	0		Ja	2	1	nein	0
14	Kontrolle	w	85	163	70	2	geschlossen	ja	mäßig	9	US	OSG+Unterschenkel	3						0	Ja	Nein	Ja	00:41:00	00:49:00	00:52:00	00:55:00	3	01:23:00	01:37:00	01:50:00	70	170	80	98	70	165	80	88		5	Nein	0		Ja	2	0	Ja	5	5
15	PNB	m	62	180	90	1	geschlossen	nein		8	OS	Femur	2	Nein	20	A	Ja	0	0	Ja	Nein	Ja	17:22:00	17:35:00	15:50:00	17:52:00	2	18:00:00	18:10:00	18:10:00	80	122	70	94	63	140	90	99	14	0	Nein	0		nein	0	0	nein	0
16	Kontrolle	w	38	176	67	1	geschlossen	ja	nicht möglich	10	US	OSG	5						6	Nein	Ja	Nein	08:51:00	08:59:00	09:10:00	09:14:00	4	09:30:00	09:48:00	09:48:00	87	118	72	98	75	120	80	98		8	ja	8	8	Ja	3	1	Ja	8	8
17	Kontrolle	m	39	190	100	1	offen	ja	nicht möglich	10	US	Unterschenkel	3						0	Ja	Ja	Ja	16:11:00	16:16:00	16:19:00	16:21:00	2	16:38:00	16:45:00	16:45:00	100	200	100	99	80	150	90	99		0	ja	10	10	Ja	3	3	Ja	9	9
18	PNB	w	51	175	80	1	geschlossen	ja	gut	9	US	OSG	4	Nein	20	A	Ja	1	0	Ja	Nein	Ja	10:20:00	10:30:00	10:40:00	10:44:00	4	11:10:00	11:20:00	11:20:00	110	100	70	91	90	150	80	98		0	Nein	0		Ja	3	0	nein	0
19	PNB	w	51	175	80	1	geschlossen	ja	gut	9	US	OSG	4	Nein	20	A	Ja	1	0	Ja	Nein	Ja	10:20:00	10:30:00	10:40:00	10:44:00	4	11:10:00	11:20:00	11:20:00	110	100	70	91	90	150	80	98	17	0	Nein	0		Ja	3	0	nein	0
20	PNB	w	49	170	70	1	offen	nein		10	US	Tibia	3	Nein	20	A	Ja	2	0	Ja	Nein	Ja	13:07:00	13:15:00	13:30:00	13:34:00	4	13:50:00	14:00:00	14:00:00	130	80	60	99	70	140	100	99	24	0	Nein	0		Ja	2	2	nein	0
21	PNB	w	49	170	70	1	offen	nein		10	US	Tibia	3	Nein	20	A	Ja	2	0	Ja	Nein	Ja	13:07:00	13:15:00	13:30:00	13:34:00	4	13:50:00	14:00:00	14:00:00	130	80	60	99	70	140	100	99	24	0	Nein	0		Ja	2	2	nein	0
22	Kontrolle	w	86	158	83	2	geschlossen	nein		9	OS	Femur	3						0	Ja	Nein	Ja	00:20:00	00:32:00	00:40:00	00:43:00	3	01:00:00	01:22:00	02:00:00	88	150	80	97	69	170	80	85		5	Nein	0		Ja	2	2	Ja	5	5
23	Kontrolle	m	64	185	87	1	geschlossen	ja	gut	2	US	OSG	2						0	Ja	Nein	Ja	08:50:00	08:55:00	08:59:00	09:00:00	1	09:10:00	09:23:00	09:50:00	70	155	85	97	73	155	80	98		3	Nein	0		Ja	3	2	Ja	8	8
24	PNB	m	79	175	90	3	geschlossen	ja	gut	4	US	OSG	2	Nein	20	A	Ja	4	0	Ja	Nein	Ja	03:17:00	03:28:00	03:40:00	03:42:00	2	04:15:00	04:25:00	04:30:00	90	160	80	98	82	130	70	98	8	0	Nein	0		nein	0	0	nein	0
25	PNB	m	79	175	90	3	geschlossen	ja	gut	4	US	OSG	2	Nein	20	A	Ja	4	0	Ja	Nein	Ja	03:17:00	03:28:00	03:40:00	03:42:00	2	04:15:00	04:25:00	04:30:00	90	160	80	98	82	130	70	98	8	0	Nein	0		nein	0	0	nein	0
26	PNB	w	42	170	90	1	geschlossen	ja	gut	8	OS	Femur	2	ja	20	A	Ja	4	0	Nein	Ja	Nein	15:48:00	16:00:00	16:15:00	16:18:00	3	16:25:00	16:40:00	16:45:00	100	160	80	99	58	118	60	99	10	0	Nein	0		Ja	3	3	nein	0
27	PNB	m	25	185	90	1	geschlossen	ja	gut	7	OS	Knie, Patella	4	Nein	20	A	Ja	3	0	Ja	Nein	Ja	20:43:00	20:51:00	20:54:00	20:58:00	4	21:11:00	21:18:00	21:20:00	120	115	80	99	80	111	80	99	16	0	Nein	0		Ja	3	0	nein	0
28	PNB	m	57	170	95	2	geschlossen	ja	gut	8	US	OSG	2	Nein	20	A	Ja	2	0	Ja	Nein	Ja	13:48:00	14:10:00	14:15:00	14:17:00	2	14:35:00	14:45:00	14:50:00	100	160	80	99	85	143	90	99	7	0	Nein	0		Ja	0	3	nein	0
29	PNB	m	57	170	95	2	geschlossen	ja	gut	8	US	OSG	2	Nein	20	A	Ja	2	0	Ja	Nein	Ja	13:48:00	14:10:00	14:15:00	14:17:00	2	14:35:00	14:45:00	14:50:00	100	160	80	99	85	143	90	99	7	0	Nein	0		Ja	0	3	nein	0
30	PNB	m	41	180	90	2	geschlossen	ja	gut	8	OS	Knie, Patella	2	Nein	20	A	Ja	2	0	Nein	Nein	Nein	06:37:00	06:45:00	06:55:00	06:57:00	2	07:12:00	07:20:00	07:50:00	90	137	80	100	90	140	75	99	12	2	Nein	0		Ja	3	3	Ja	2	2
[truncated: 15 more columns]
